# Supplementary material for: A framework for best practices in clinical outcome assessment (COA) concept mapping: a case study
Source: PubMed Central journal article supplement — Qual Life Res. 2024 Aug 29;33(11):2941–8. doi: 10.1007/s11136-024-03773-2 (PMC11541245; doi:10.1007/s11136-024-03773-2), 2024-08-29

**Title:**

A framework for best practices in clinical outcome assessment (COA) concept mapping: A case study

**Journal:**

*Quality of Life Research*

**Authors:**

Meaghan O'Connor<sup>a</sup> (moconnor@qualitymetric.com), Lynne Broderick<sup>a</sup>, Miranda Lauher-Charest<sup>a</sup>, Laura Tesler Waldman<sup>a</sup>, Kristi Jackson<sup>a</sup>, Mark Kosinski<sup>a</sup>, Michelle Carty<sup>a</sup>

<sup>a</sup>Quality Metric, Johnston, RI, USA

**Supplementary File 1.**

Supplementary File 1, Table 1. Targeted Literature Review Search Strings

| Database           | Search Terms                                                                                                                                                                                                                                                                                                                                    | Total Records |
|--------------------|-------------------------------------------------------------------------------------------------------------------------------------------------------------------------------------------------------------------------------------------------------------------------------------------------------------------------------------------------|---------------|
| Google             | <p>The following terms and phrases were searched:</p> <ul style="list-style-type: none"> <li>• “Mapping patient data to PRO”</li> <li>• “Qualitative interview data and PRO development”</li> <li>• “Concept mapping”</li> <li>• “Content matching”</li> <li>• “PRO linking”</li> <li>• “Outcomes research and mapping patient data”</li> </ul> | 10            |
| PubMed             | ((((ICF) OR (ICF categories)) AND (outcome research)) AND (outcome assessment)) AND (interview)                                                                                                                                                                                                                                                 | 30            |
| CINAHL<br>SocINDEX | “patient-reported outcome measure AND mapping OR matching”                                                                                                                                                                                                                                                                                      | 2             |

Supplementary File 1, Figure 1. Targeted Literature Review PRISMA Diagram

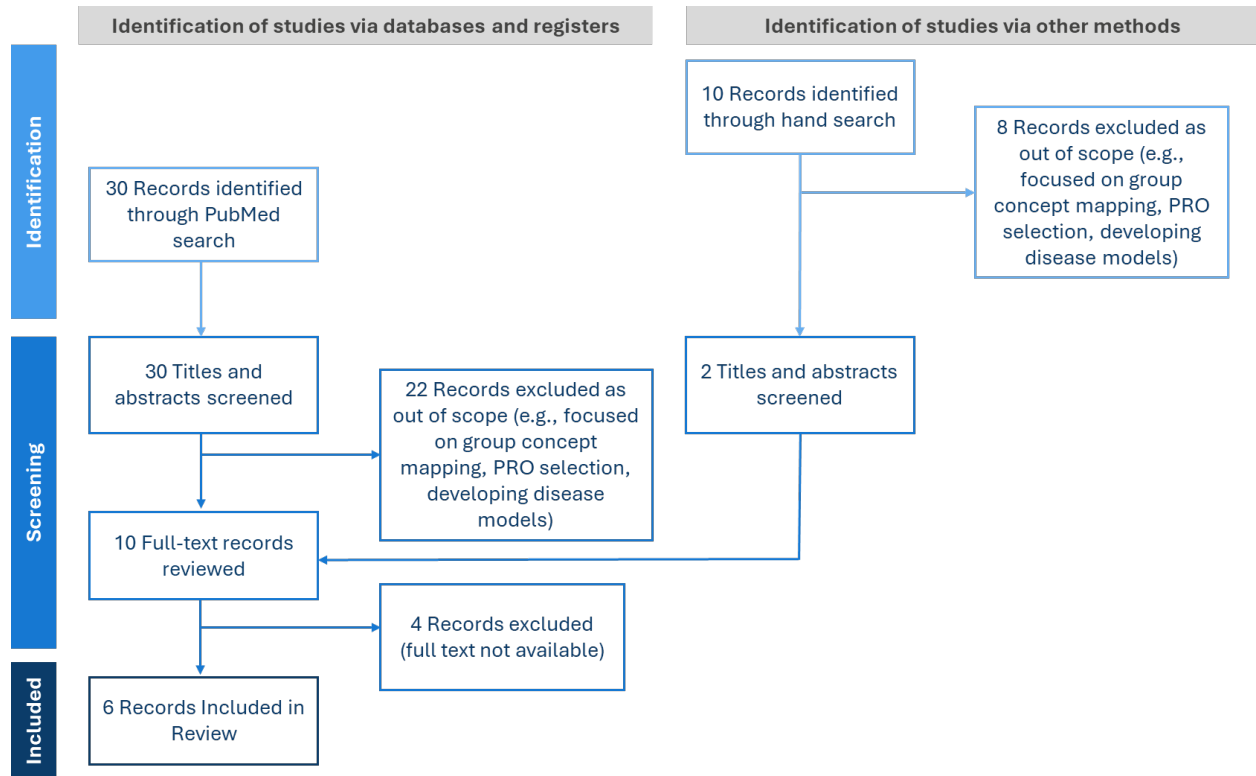

Supplementary File 1, Figure 2. Focus Group Participant Descriptions

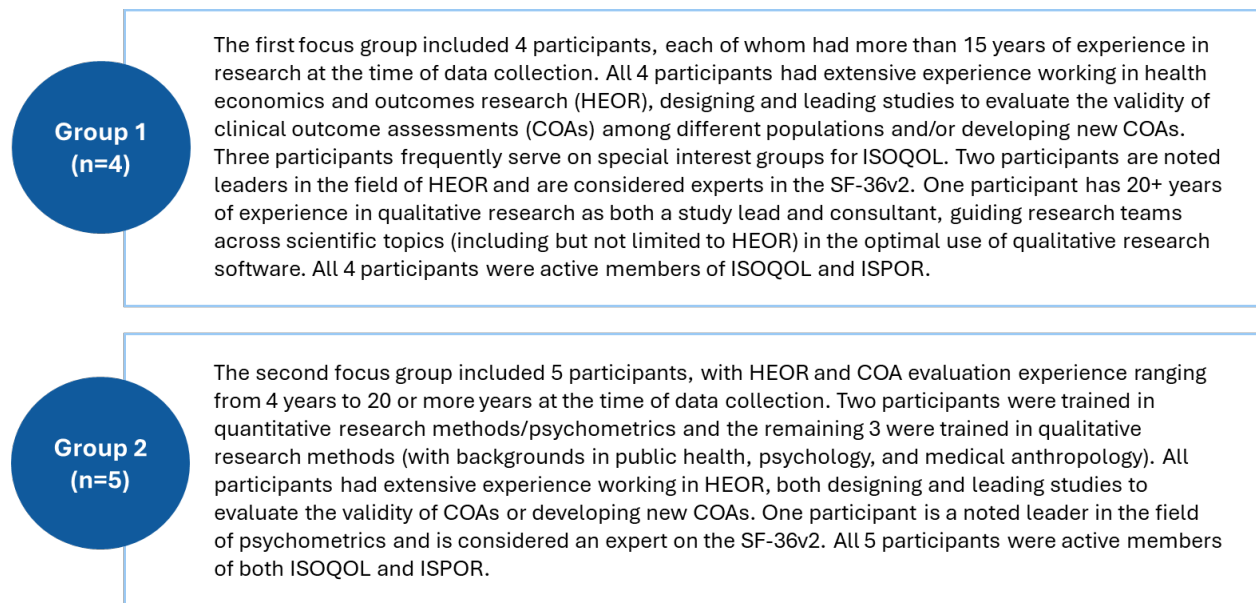

Supplement: 11136_2024_3773_MOESM1_ESM.pdf [file 11136_2024_3773_MOESM1_ESM.pdf]
