# Supplementary material for: A framework for best practices in clinical outcome assessment (COA) concept mapping: a case study
Source: PubMed Central journal article supplement — Qual Life Res. 2024 Aug 29;33(11):2941–8. doi: 10.1007/s11136-024-03773-2 (PMC11541245; doi:10.1007/s11136-024-03773-2), 2024-08-29

**Title:**

A framework for best practices in clinical outcome assessment (COA) concept mapping: A case study

**Journal:**

*Quality of Life Research*

**Authors:**

Meaghan O'Connor<sup>a</sup> (moconnor@qualitymetric.com), Lynne Broderick<sup>a</sup>, Miranda Lauher-Charest<sup>a</sup>, Laura Tesler Waldman<sup>a</sup>, Kristi Jackson<sup>a</sup>, Mark Kosinski<sup>a</sup>, Michelle Carty<sup>a</sup>

<sup>a</sup>Quality Metric, Johnston, RI, USA

**Supplementary File 2.**

Supplementary File 2, COA Concept Mapping Results Table Display 1: Basic Table Showing Concept Coverage by Measure

| Concept                        | PRO Measure of Interest |   |   |   |   |   |   |   |   |   |
|--------------------------------|-------------------------|---|---|---|---|---|---|---|---|---|
|                                | A                       | B | C | D | E | F | G | H | I | J |
| Stigma, embarrassment          |                         | X |   |   |   |   |   |   |   |   |
| Mood: upset, angry, frustrated |                         |   | X | X | X |   |   |   |   |   |
| Overall HRQoL                  | X                       |   | X |   | X |   | X |   |   | X |
| Physical functioning           | X                       |   | X | X | X |   | X |   |   |   |
| Social functioning             | X                       |   | X | X | X | X | X | X |   |   |
| Social isolation               |                         | X | X | X |   |   |   | X |   | X |
| Difficulty dressing            | X                       |   | X |   |   |   | X |   |   |   |
| Difficulty with hygiene        | X                       |   | X |   |   |   | X |   |   |   |
| Difficulty drinking from a cup |                         |   | X |   |   |   |   |   |   |   |
| Difficulty speaking            |                         |   | X |   |   |   |   |   |   |   |
| Difficulty writing             |                         |   | X |   |   |   |   |   |   |   |

Supplementary File 2, COA Concept Mapping Results Table Display 2: Detailed Table with Items, Concepts, and Key Descriptors

| Item                                                          | Concept                                                                       | Key Descriptor         |
|---------------------------------------------------------------|-------------------------------------------------------------------------------|------------------------|
| Item 1<br>How often did you have energy for fun activities?   | Experience; describes a specific situation                                    | “Energy/energetic”     |
| Item 5<br>How often were you physically tired?                | Experience; addresses physical aspect                                         | “Energy/energetic”     |
| Item 12<br>How often were you drained?                        | Experience; addresses physical or mental aspect                               | “Drained”              |
| Item 17<br>How often were you completely exhausted?           | Experience; addresses physical or mental aspect                               | “Exhausted/exhaustion” |
| Item 18<br>How often did your exhaustion feel uncontrollable? | Experience; participants commonly reported fatigue as having “no quick fixes” | n/a                    |

Supplementary File 2, COA Concept Mapping Results Graphic Display 1: Bar Chart

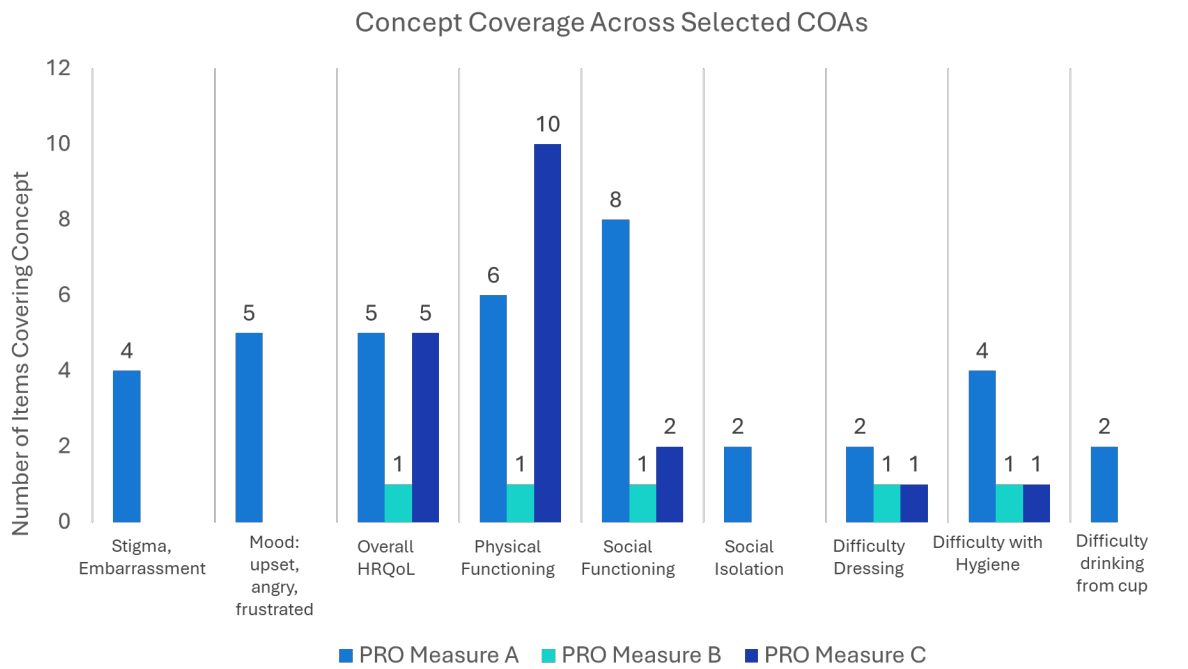

Supplementary File 2, COA Concept Mapping Results Graphic Display 2: Mind Map

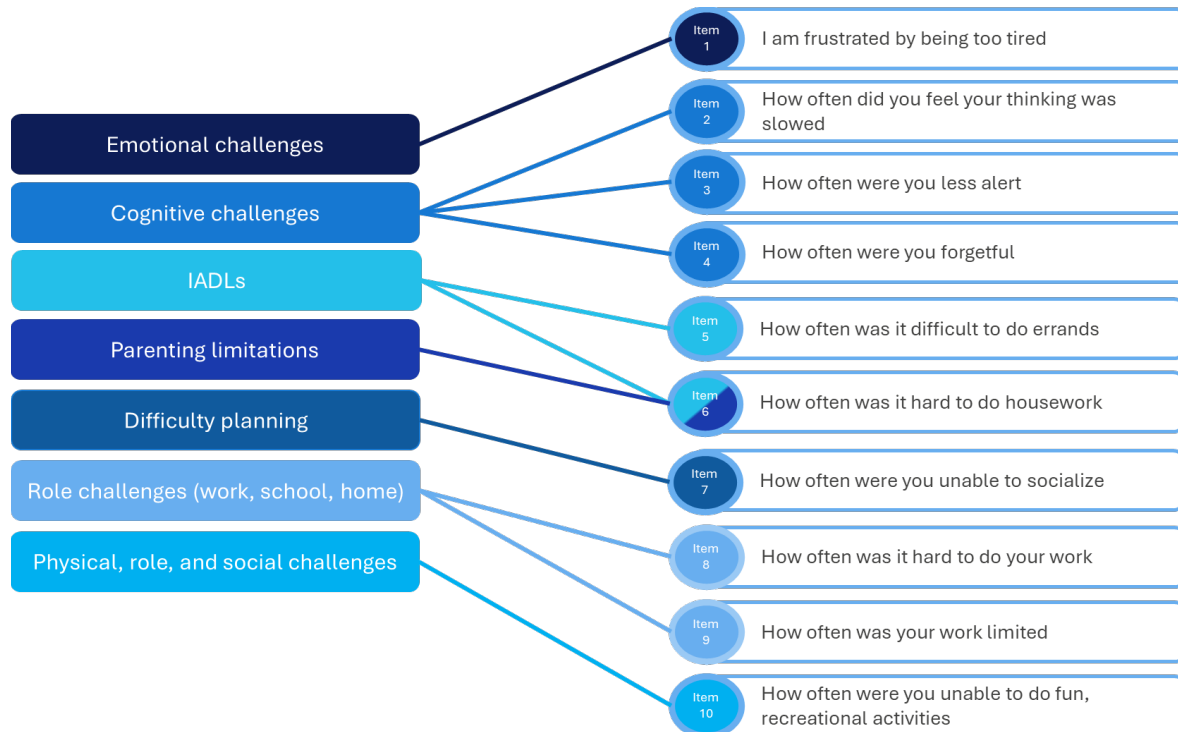

Supplement: 11136_2024_3773_MOESM2_ESM.pdf [file 11136_2024_3773_MOESM2_ESM.pdf]
